the surgical services in whom survival could clearly be attributed to the restoration of blood pressure to normal or nearly normal levels by the use of these agents. Sympathomimetic agents should be reserved for situations in which it is clear that the hypotension is entirely, or in part, due to vasomotor paralysis. (Simeone, F. A.: *Shock and Blood Pressure, Surg. Gynec. & Obst.* 108: 740 (June) 1959.)

**BLOOD VOLUME** Because of the lack of information on the changes in plasma and blood volume in chronic anemia, these parameters have been studied on 74 patients who were either hematologically normal or had chronic nutritional anemia, some with a hemoglobin level of less than 2.0 Gm. Blood volume was found to fall as hemoglobin levels declined. This drop was almost wholly due to the diminution in red cell volume. (Tasker, P. W. G.: *Blood-Volume in Chronic Nutritional Anaemia, Lancet* 1: 807 (April 18) 1959.)

**DEXTRAN** Nonbiologic colloid solutions have been used for over 100 years for research purposes. However, it was not until 1913 that the value of the infusion of such a colloid solution for the preoperative and postoperative treatment of conditions associated with a diminished blood volume was demonstrated in man. By accident, dextran was found to have satisfactory properties to enable it to be administered intravenously to man. By the end of World War II, it had been refined and approved in Scandinavia, England, and in the United States. It is an excellent plasma expander and it is especially rational to maintain an adequate blood volume with dextran during operation, so long as not more than three-quarters of a liter of blood is lost. If more than this amount of blood is lost, then blood should be administered. (Thorsen, G.: *Use of Dextran as Infusion Fluids, Surg. Gynec. & Obst.* 109: 43 (July) 1959.)

**HEPATITIS FROM TRANSFUSION.** An analysis has been made of the incidence of serum hepatitis following the administration of 14,445 units of whole blood; 3,349 patients were given 7,315 units of blood. Nineteen patients, or 1 in 380, developed serum hep-

titis. Six-hundred and seventy-four patients received plasma and whole blood. There were 6 cases of hepatitis in this group, 1 in 360. An additional 317 patients received pooled plasma obtained from 4,461 donors and stored for six months at room temperatures averaging 80.6 F. No patient developed hepatitis in this group. (Hoxworth, P. I., Haesler, W. E., Jr., and Smith, H., Jr.: *Risk of Hepatitis from Whole Blood and Stored Plasma, Surg. Gynec. & Obst.* 109: 38 (July) 1959.)

**HEMOPHILIA** Fresh frozen plasma in a dose of about 20 ml./kg. bodyweight, normalized blood coagulation in hemophilia for 24 hours. The administration has to be repeated daily as long as there is risk of hemorrhage about 15 days after surgery. (Cazal, P., Izarn, P., and Paleirac, G.: *Problems with Operations on Hemophiles, Der Anaesthetist* 8: 122 (May) 1959.)

**HYPOTHERMIA** Twelve patients with intracranial aneurysms have been treated satisfactorily using hypothermia and total arterial occlusion. Patient's body temperature was lowered to 27 to 30 C. by immersion in an ice tub, and subsequent transfer to a cooling blanket. The intracranial aneurysm and the superior mediastinal arteries were closed simultaneously by two surgical teams. During the dissection of the aneurysm, systemic arterial hypotension was induced by Arfonad. Total occlusion of the circulation to the brain was effected during repair of the aneurysm. The complications encountered were avoidable. Temporary cardiac arrest occurred in two patients, in one due to an overdose of Arfonad. There was one operative death due to recurrent hemorrhage. Six of the patients have been followed four to fifteen months and are well. (Adams, J. E., and Wylie, E. J.: *Value of Hypothermia and Arterial Occlusion in Treatment of Intracranial Aneurysms, Surg. Gynec. & Obst.* 108: 631 (May) 1959.)

**HYPOTHERMIA** Controlled hypothermia has been successfully used in the treatment of a 23 year old patient with fulminating eclampsia. In addition, nitrous oxide, oxygen fluorothane, meperidine, and phenothiazines were

Downloaded from http://ajph.gapub.org/ at University of California, San Francisco on March 13, 2024
